# Supplementary material
Source: Springer Nature journal article supplement (https://www.springermedizin.de/resource/supplementary/12933_2009_174_MOESM1_ESM.pdf/9539756)

### DIABETICS

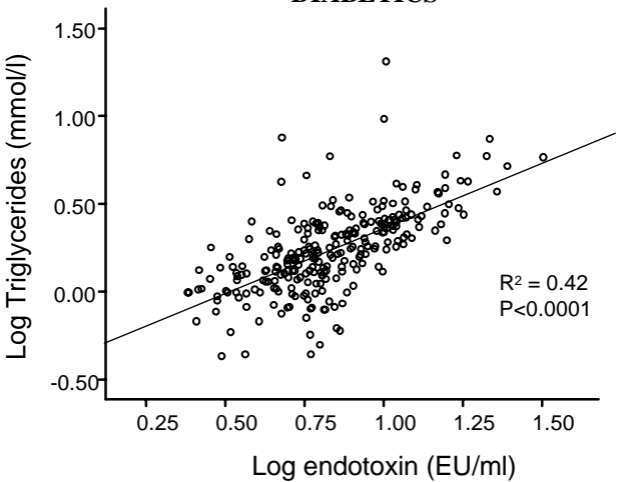

### DIABETICS

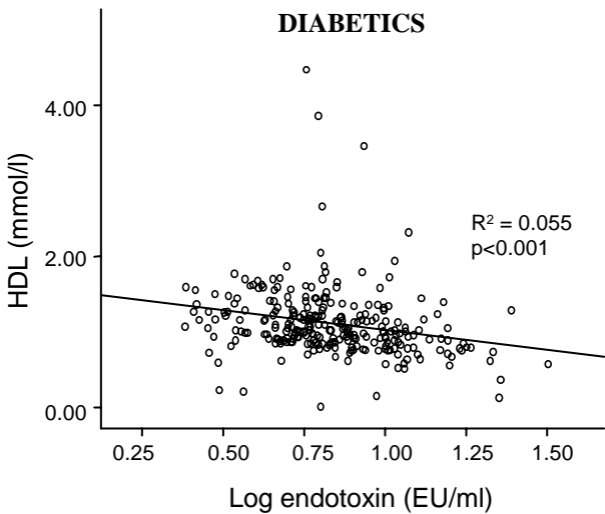

### DIABETICS

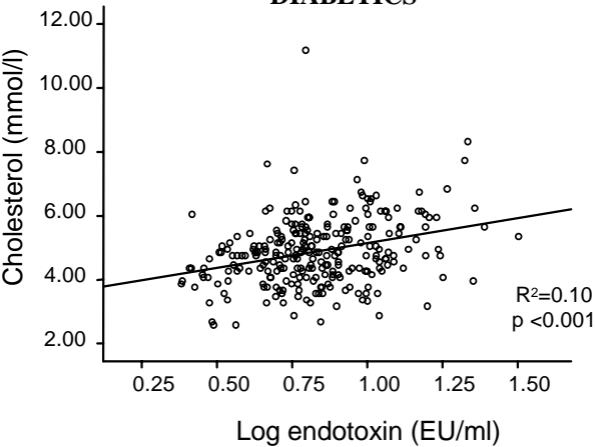

Supplement: MOESM1 [file 9539756]
